# Supplementary material for: Mediated electron transfer in a photo-bioreactor: continuous flow hydroxylation using cytochrome P450 BM3 in NADPH-free conditions
Source: Royal Society of Chemistry journal article supplement (doi:10.1039/d3re00569k), 2023-11-28
Supplement: d3re00569k1.pdf [file d3re00569k1.pdf]

## Electronic supplementary material

### Mediated Electron Transfer in a Photo-Bioreactor: Continuous Flow Hydroxylation Using Cytochrome P450 BM3 In NADPH-Free Conditions

Ali Fendri<sup>1,2,3</sup>, Donya Valikhani<sup>1,2,3</sup>, and Joelle N. Pelletier<sup>1,2,3\*</sup>

\*Corresponding author: Joelle N. Pelletier. email: joelle.pelletier@umontreal.ca

<sup>1</sup> Department of Chemistry, Université de Montréal, 1375 Thérèse-Lavoie-Roux ave, Montréal, Canada

<sup>2</sup> Center for Green Chemistry and Catalysis (CGCC), 1375 Thérèse-Lavoie-Roux ave, Montréal, Canada

<sup>3</sup> PROTEO, the Québec Network for Protein Function, Engineering and Applications, Québec, Canada

#### Table of Contents

Figure S1. NADPH consumption using immobilized and free P450 BM3.

Figure S2. The continuous flow flat-bed reactor design and measurements.

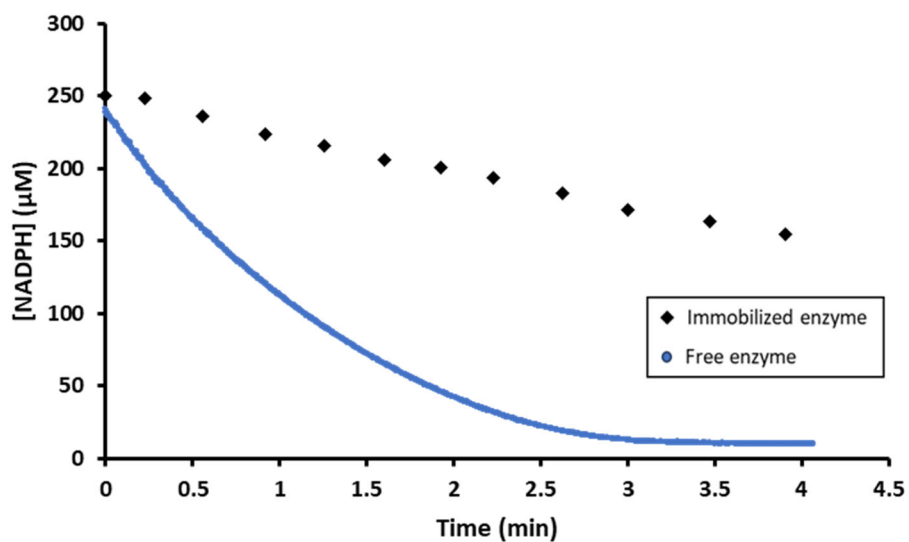

**Figure S1.** NADPH consumption using immobilized and free P450 BM3. The same enzyme concentration (1  $\mu\text{M}$ ) was used in presence of lauric acid (0.4 mM) and NADPH (250  $\mu\text{M}$ ) in phosphate buffer (pH 7.2). NADPH quantification was continuously monitored at 340 nm for the free enzyme. For the immobilized enzyme a discontinuous assay was used.

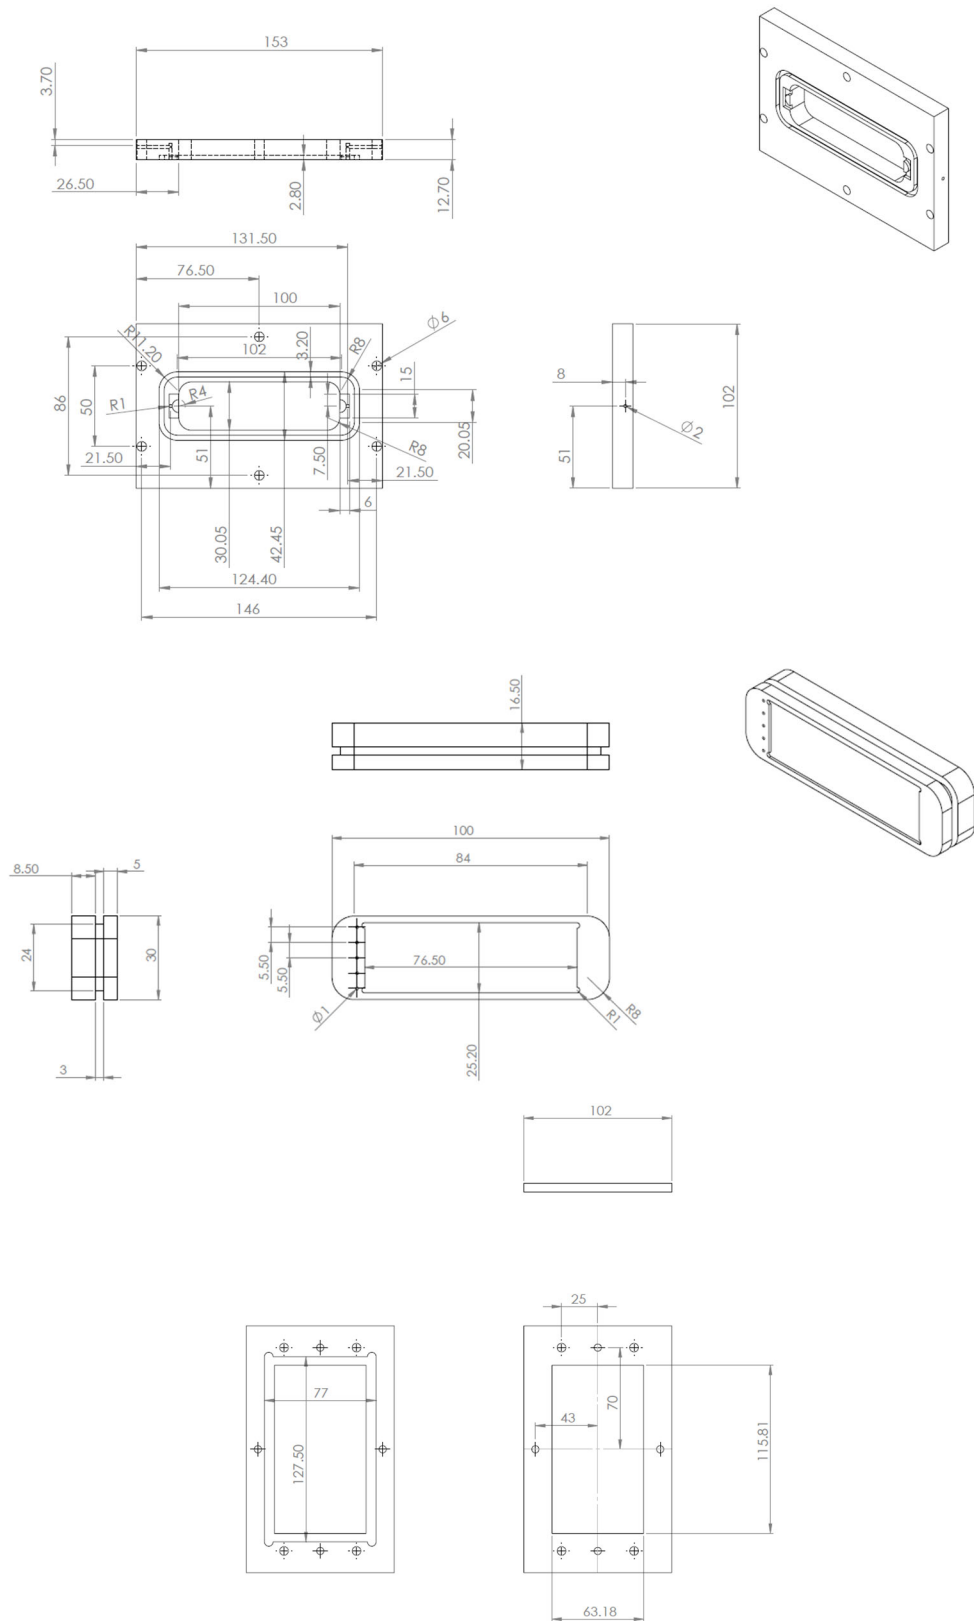

**Figure S2.** The continuous flow flat-bed reactor design and measurements. Scheme drawn using DOLIDWORKS AutoCAD. All measurements are presented in mm.
